# Supplementary material for: Assessing Online Dietary Information for People With Schizophrenia
Source: Atypon-hosted journal article supplement (doi:10.1176/appi.ps.201400205), 2014-10-01
Supplement: 1286_ds001.pdf [file 1286_ds001.pdf]

## Appendix

Blogger (2014). *Blogger website*. Retrieved July 3, 2014, from

<http://selfprescription.blogspot.ca/>

Botanical-online.com (2014). *Botanical-online website*. Retrieved July 3, 2014, from

<http://www.botanical-online.com/>

DocGuide (2004). *DocGuide website*. Retrieved July 3, 2014, from <http://www.docguide.com/>

Dr. McDougall's Health and Medical Center (2014). *Dr. McDougall's Health and Medical Center website*. Retrieved May 1, 2014, from <http://www.drmcDougall.com/>

EverydayHealth (2009). *EverydayHealth website*. Retrieved July 3, 2014, from

<http://www.everydayhealth.com/>

Healio (2004). *Healio website*. Retrieved July 3, 2014, from <http://www.healio.com/>

HealthCentral (2012). *HealthCentral website*. Retrieved July 3, 2014, from

<http://www.healthcentral.com/>

Michael Alzamora (2006). *Michael Alzamora website*. Retrieved July 3, 2014, from

<http://www3.sympatico.ca/michael.alzamora/>

News Medical (2013). *News Medical website*. Retrieved July 3, 2014, from <http://www.news-medical.net/>

PsychForums.com (2011). *PsychForums.com website*. Retrieved July 3, 2014, from

<http://www.psychforums.com/>

Quizlet (2013). *Quizlet website*. Retrieved July 3, 2014, from <http://quizlet.com/>

Schizophrenia.com (2007). *Schizophrenia.com website*. Retrieved July 3, 2014, from

<http://www.schizophrenia.com/>

Schizophrenia Research Institute (2013). *Schizophrenia Research Institute website*. Retrieved

July 3, 2014, from <http://www.schizophreniaresearch.org.au/>
